# Supplementary material
Source: PubMed Central journal article supplement (PMC10436188)

## Supplementary Online Content

Sekimitsu S, Xiang D, Smith SL, et al; UK Biobank Eye and Vision Consortium. Deep ocular phenotyping across primary open-angle glaucoma genetic burden. *JAMA Ophthalmol*. Published online August 17, 2023. doi:10.1001/jamaophthalmol.2023.3645

**eTable 1.** Glaucoma Medications

**eTable 2.** Retinal Layer Boundaries of Interest

**eTable 3.** Study Population Characteristics

**eTable 4.** Ocular Factors by POAG PRS Decile

**eTable 5.** Retinal Layer Thicknesses

**eTable 6.** Association of Retinal Layer Thicknesses per 1 Point Increase in PRS

**eFigure 1.** Use of Glaucoma Medications or Prior Glaucoma Surgery/Laser per POAG PRS Decile

**eFigure 2.** Ocular Factors (SE, CHF, CRF, IOPcc) per POAG PRS Decile

**eFigure 3.** Fundus Photograph Characteristics (Hemorrhage On Disc, Suspicious Optic Disc Features, and Cup-to-Disc Ratio) by POAG PRS Decile

**eFigure 4.** Figure 4. Retinal Nerve Fiber Layer (RNFL) and Ganglion Cell Complex (GCC) Layer Thickness Among Individuals With Primary Open-Angle Glaucoma (POAG), Decile 1 vs Decile 10 of POAG Polygenic Risk Score (PRS)

This supplementary material has been provided by the authors to give readers additional information about their work.

**eTable 1. Glaucoma Medications.**

| <b>Code</b> | <b>Medication</b>                                  |
|-------------|----------------------------------------------------|
| 1140853558  | physostigmine+pilocarpine 0.25%+2% eye drops       |
| 1140875816  | pilocarpine                                        |
| 1140875840  | timolol 0.25% eye drops                            |
| 1140875934  | apraclonidine                                      |
| 1140877988  | teoptic 1% eye drops                               |
| 1140878080  | sno pilo 1% eye drops                              |
| 1140878092  | minims pilocarpine nitrate 1% single-use eye drops |
| 1140878098  | betagan eye drops                                  |
| 1140879758  | betaxolol                                          |
| 1140879822  | carteolol                                          |
| 1140879826  | levobunolol                                        |
| 1140879866  | timolol                                            |
| 1140881882  | timoptol 0.25% eye drops                           |
| 1140881890  | betoptic 0.5% eye drops                            |
| 1140922714  | dorzolamide                                        |
| 1140922718  | trusopt 2% ophthalmic solution                     |
| 1141146188  | latanoprost                                        |
| 1141146198  | xalatan 0.005% eye drops                           |
| 1141169516  | dorzolamide+timolol                                |
| 1141169520  | cosopt 2%/0.5% eye drops                           |
| 1141176284  | brinzolamide                                       |
| 1141176288  | azopt 10mg/ml eye drops                            |
| 1141179734  | nyogel 0.1% liquid eye gel                         |
| 1141179914  | bimatoprost                                        |
| 1141179920  | lumigan 0.3mg/ml eye drops                         |
| 1141184722  | latanoprost+timolol                                |
| 1141184726  | xalacom 0.005%/0.5% eye drops                      |
| 1141185316  | travoprost                                         |
| 1141185326  | travatan 40micrograms/ml eye drops                 |
| 1140921818  | iopidine ophthalmic 0.5% intra-ocular solution     |
| 1141150750  | brimonidine tartrate                               |
| 1141150754  | alphagan 0.2% eye drops                            |
| 1140856568  | acetazolamide [ep] 250mg tablets                   |
| 1140875868  | acetazolamide                                      |
| 1140875870  | diamox 250mg tablet                                |

**eTable 2. Retinal layer boundaries of interest.**

| Layer                      | Boundaries of interest                                                  |
|----------------------------|-------------------------------------------------------------------------|
| Retinal nerve fiber layer  | Internal limiting membrane-nerve fiber layer                            |
| Ganglion cell layer        | Nerve fiber layer-ganglion cell layer                                   |
| Inner plexiform layer      | Ganglion cell layer-inner plexiform layer                               |
| Ganglion cell complex      | Retinal nerve fiber layer + ganglion cell layer + inner plexiform layer |
| Inner nuclear layer        | Inner plexiform layer-inner nuclear layer                               |
| Outer plexiform layer      | Inner nuclear layer-external limiting membrane                          |
| Photoreceptor segment      | External limiting membrane-retinal pigment epithelium                   |
| Retinal pigment epithelium | Retinal pigment epithelium-Bruch's membrane                             |
| Choroid scleral interface  | Bruch's membrane-chorio-scleral interface                               |

**eTable 3. Study Population Characteristics.**

| Characteristic         |                  |
|------------------------|------------------|
| Age (SD)               | 56.3 (8.05)      |
| Ancestry:              |                  |
| African (%)            | 7,738 (1.90%)    |
| American (%)           | 784 (0.19%)      |
| East / South Asian (%) | 9,099 (2.23%)    |
| European (%)           | 390,046 (95.70%) |
| Male sex (%)           | 188,484 (46.2%)  |

**eTable 4. Ocular Factors by POAG PRS decile.**

| POAG PRS Decile | IOPcc (mean) | IOPcc (SD) | CH (mean) | CH (SD) | CRF (mean) | CRF (SD) | SE (mean) | SE (SD) |
|-----------------|--------------|------------|-----------|---------|------------|----------|-----------|---------|
| 1               | 15.65        | 3.83       | 10.54     | 1.86    | 10.43      | 1.96     | -0.06     | 2.31    |
| 2               | 15.94        | 3.86       | 10.54     | 1.87    | 10.51      | 1.98     | -0.15     | 2.32    |
| 3               | 16.12        | 3.95       | 10.47     | 1.9     | 10.5       | 1.99     | -0.14     | 2.34    |
| 4               | 16.31        | 4.04       | 10.43     | 1.9     | 10.5       | 1.98     | -0.17     | 2.33    |
| 5               | 16.39        | 4.01       | 10.4      | 1.93    | 10.5       | 1.98     | -0.23     | 2.39    |
| 6               | 16.64        | 4.18       | 10.38     | 1.92    | 10.56      | 2        | -0.23     | 2.36    |
| 7               | 16.81        | 4.12       | 10.34     | 1.89    | 10.57      | 1.98     | -0.19     | 2.35    |
| 8               | 16.96        | 4.29       | 10.35     | 1.93    | 10.61      | 2        | -0.26     | 2.37    |
| 9               | 17.27        | 4.34       | 10.31     | 1.91    | 10.64      | 2        | -0.31     | 2.34    |
| 10              | 17.78        | 4.62       | 10.24     | 1.93    | 10.71      | 2        | -0.39     | 2.31    |

**eTable 5. Retinal layer thicknesses.**

| Layer                      | Overall Mean (SD) (um) | Superior Mean (SD) (um) | Inferior Mean (SD) (um) |
|----------------------------|------------------------|-------------------------|-------------------------|
| Retinal nerve fiber layer  | 39.78 (4.74)           | 39.21 (5.36)            | 40.7 (5.96)             |
| Ganglion cell layer        | 33.31 (2.81)           | 32.96 (3.51)            | 33.4 (3.65)             |
| Inner plexiform layer      | 28.97 (2.57)           | 28.76 (3.01)            | 28.98 (2.99)            |
| Ganglion cell complex      | 102.05 (8.26)          | 100.93 (9.15)           | 103.09 (9.41)           |
| Inner nuclear layer        | 30.86 (2.04)           | 30.84 (2.46)            | 30.74 (2.4)             |
| Outer plexiform layer      | 77.23 (5.81)           | 78.85 (6.35)            | 75.18 (6.26)            |
| Photoreceptor segment      | 40.02 (2.51)           | 40.35 (2.74)            | 39.6 (2.83)             |
| Retinal pigment epithelium | 23.18 (1.83)           | 23.26 (3.26)            | 23.11 (2.4)             |
| Choroid scleral interface  | 201.13 (46.48)         | 205.01 (46.02)          | 197.12 (52.53)          |

**eTable 6. Association of retinal layer thicknesses per 1 point increase in PRS.**

| Layer       | Overall   |                |         | Superior  |                |         | Inferior  |                |         |
|-------------|-----------|----------------|---------|-----------|----------------|---------|-----------|----------------|---------|
|             | Beta (um) | 95% CI         | p-value | Beta (um) | 95% CI         | p-value | Beta (um) | 95% CI         | p-value |
| <b>RNFL</b> | -0.14     | (-0.19, -0.1)  | <.001   | -0.1      | (-0.16, -0.05) | <.001   | -0.2      | (-0.26, -0.14) | <.001   |
| <b>GCL</b>  | -0.05     | (-0.08, -0.02) | <.001   | -0.05     | (-0.09, -0.02) | .003    | -0.04     | (-0.07, 0)     | .07     |
| <b>IPL</b>  | -0.06     | (-0.09, -0.04) | <.001   | -0.07     | (-0.1, -0.04)  | <.001   | -0.05     | (-0.08, -0.02) | .001    |
| <b>GCC</b>  | -0.26     | (-0.34, -0.17) | <.001   | -0.22     | (-0.32, -0.13) | <.001   | -0.29     | (-0.39, -0.19) | <.001   |
| <b>INL</b>  | -0.03     | (-0.05, -0.01) | .003    | -0.04     | (-0.07, -0.02) | <.001   | -0.02     | (-0.04, 0.01)  | .14     |
| <b>OPL</b>  | -0.03     | (-0.09, 0.03)  | .30     | -0.08     | (-0.14, -0.01) | .02     | 0.01      | (-0.05, 0.08)  | .66     |
| <b>PS</b>   | -0.03     | (-0.06, 0)     | .02     | -0.04     | (-0.07, -0.01) | .01     | -0.03     | (-0.06, 0)     | .05     |
| <b>RPE</b>  | 0         | (-0.02, 0.02)  | .83     | 0.01      | (-0.02, 0.03)  | .56     | 0.01      | (-0.01, 0.04)  | .35     |
| <b>CSI</b>  | 0.07      | (-0.38, 0.52)  | .78     | 0.23      | (-0.23, 0.69)  | .32     | -0.14     | (-0.65, 0.37)  | .60     |

Note: adjusted model includes spherical equivalence, age, age<sup>2</sup>, sex, and ancestry as covariates.

**eFigure 1. Use of glaucoma medications or prior glaucoma surgery/laser per POAG PRS decile.**

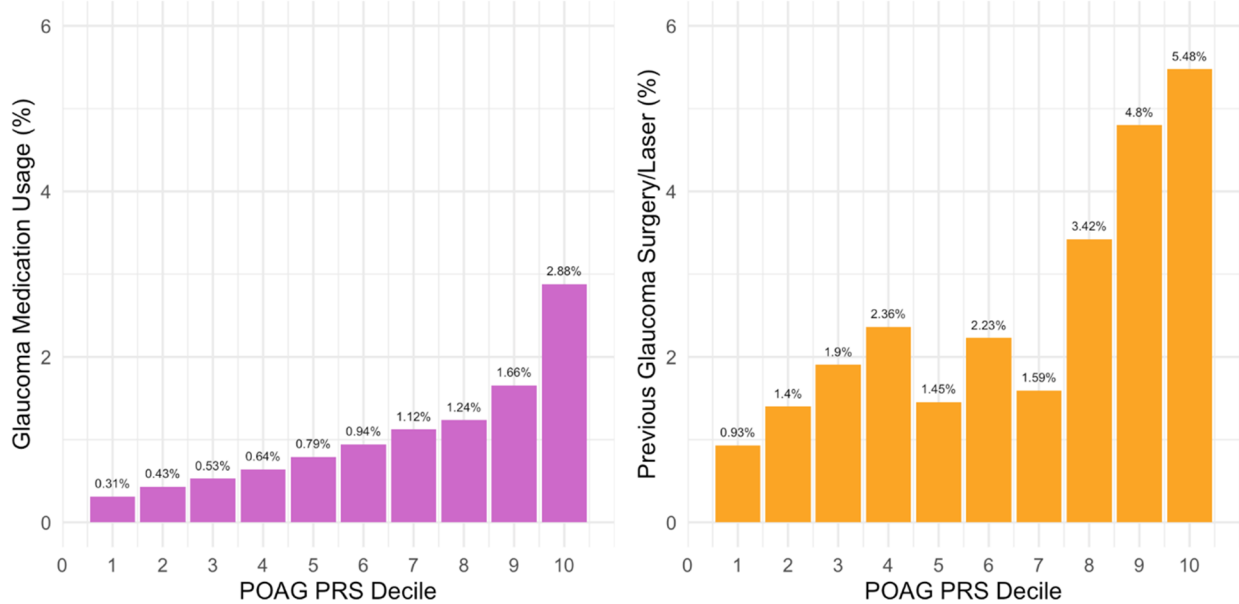

Note: POAG = primary open angle glaucoma, PRS = polygenic risk score.

**eFigure 2. Ocular factors (SE, CHF, CRF, IOPcc) per POAG PRS decile.**

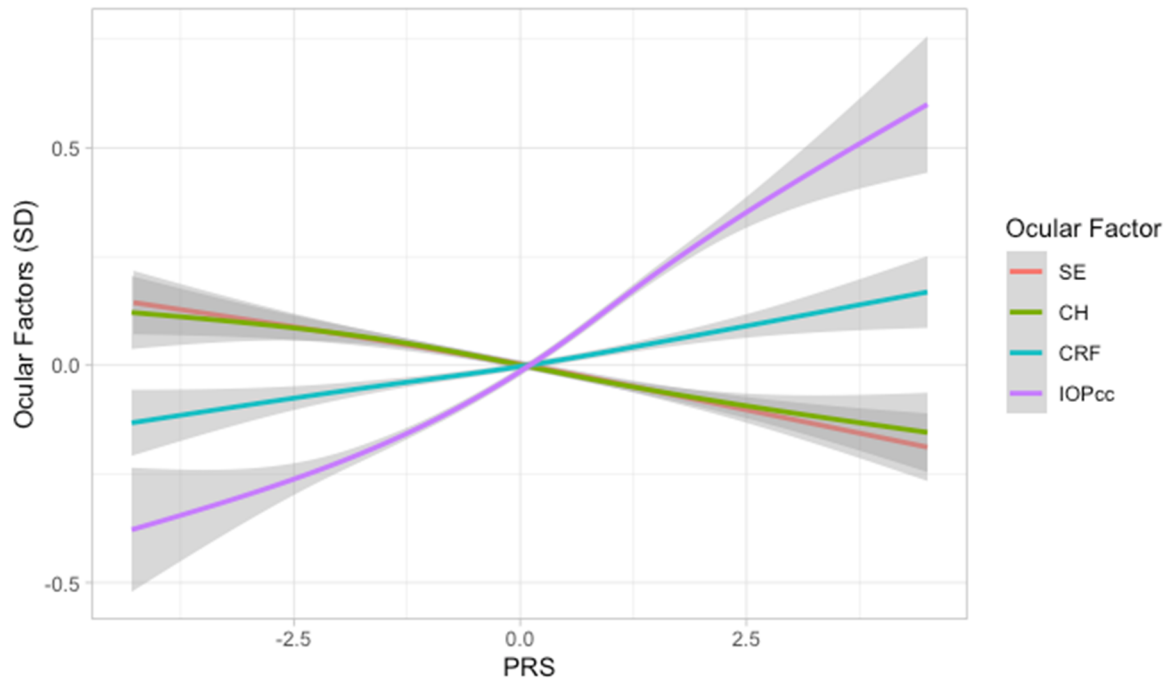

Note: SE = spherical equivalence, CHF = corneal hysteresis, CRF = corneal resistance factor, IOPcc = intraocular pressure, POAG = primary open angle glaucoma, PRS = polygenic risk score.

**eFigure 3. Fundus photograph characteristics (hemorrhage on disc, suspicious optic disc features and cup-to-disc ratio) by POAG PRS decile.**

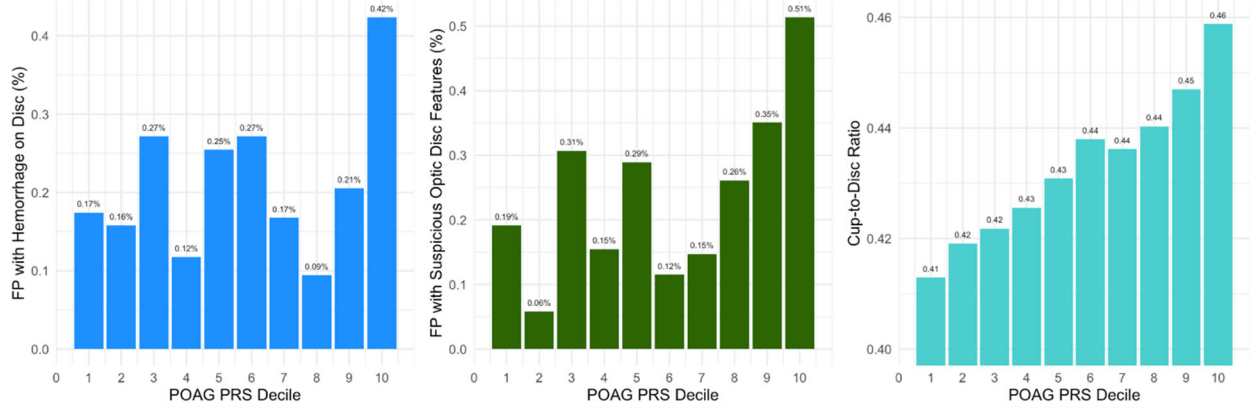

Note: POAG = primary open angle glaucoma, PRS = polygenic risk score.

**eFigure 4. Figure 4. Retinal Nerve Fiber Layer (RNFL) and Ganglion Cell Complex (GCC) Layer Thickness Among Individuals With Primary Open-Angle Glaucoma (POAG), Decile 1 vs Decile 10 of POAG Polygenic Risk Score (PRS)**

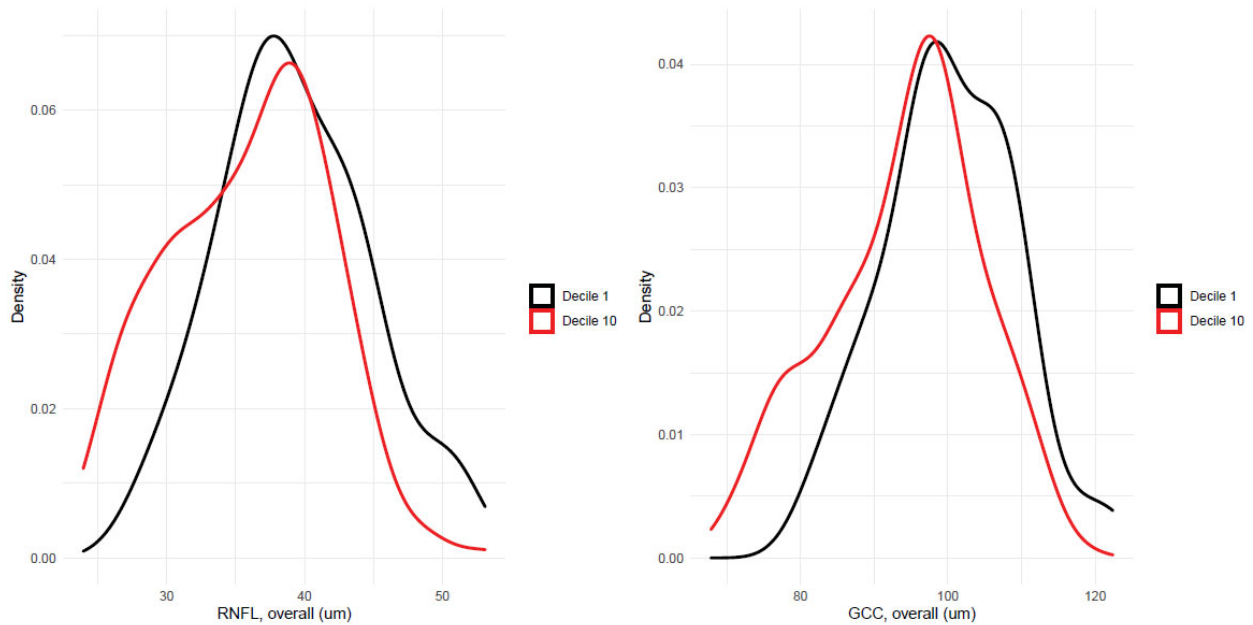

Supplement: jamaophthalmol-e233645-s001.pdf [file jamaophthalmol-e233645-s001.pdf]
