# Supplementary material
Source: PubMed Central journal article supplement (PMC10436188)
Supplement: jamaophthalmol-e233645-s002.pdf [file jamaophthalmol-e233645-s002.pdf]

\*First name, last name, and suffix (if applicable) are required and will appear in PubMed.

| <b>*Group Name(s): UK Biobank Eye and Vision Consortium</b> |                   |                              |                  |                                |                                          |                                                         |                                                                                            |
|-------------------------------------------------------------|-------------------|------------------------------|------------------|--------------------------------|------------------------------------------|---------------------------------------------------------|--------------------------------------------------------------------------------------------|
| <b>*First Name and Middle Initial(s)</b>                    | <b>*Last Name</b> | <b>*Suffix (eg, Jr, III)</b> | Academic Degrees | Institution                    | Location (city, state/province, country) | Role or Contribution, eg, chair, principal investigator | Group (if more than 1 Group listed in the byline) and/or Subgroup (eg, Steering Committee) |
| Naomi                                                       | Allen             |                              |                  | University of Oxford           |                                          |                                                         |                                                                                            |
| Tariq                                                       | Aslam             |                              |                  | The University of Manchester   |                                          |                                                         |                                                                                            |
| Denize                                                      | Atan              |                              |                  | University of Bristol          |                                          |                                                         |                                                                                            |
| Konstantinos                                                | Balaskas          |                              |                  | Moorfields Eye Hospital        |                                          |                                                         |                                                                                            |
| Sarah                                                       | Barman            |                              |                  | Kingston University            |                                          |                                                         |                                                                                            |
| Jenny                                                       | Barrett           |                              |                  | University of Leeds            |                                          |                                                         |                                                                                            |
| Paul                                                        | Bishop            |                              |                  | The University of Manchester   |                                          |                                                         |                                                                                            |
| Graeme                                                      | Black             |                              |                  | The University of Manchester   |                                          |                                                         |                                                                                            |
| Tasanee                                                     | Braithwaite       |                              |                  | St Thomas' Hospital            |                                          |                                                         |                                                                                            |
| Roxana                                                      | Carare            |                              |                  | University of Southampton      |                                          |                                                         |                                                                                            |
| Usha                                                        | Chakravarthy      |                              |                  | Queen's University Belfast     |                                          |                                                         |                                                                                            |
| Michelle                                                    | Chan              |                              |                  | Moorfields Eye Hospital        |                                          |                                                         |                                                                                            |
| Sharon                                                      | Chua              |                              |                  | UCL Institute of Ophthalmology |                                          |                                                         |                                                                                            |
| Alexander                                                   | Day               |                              |                  | Moorfields Eye Hospital        |                                          |                                                         |                                                                                            |
| Parul                                                       | Desai             |                              |                  | Moorfields Eye Hospital        |                                          |                                                         |                                                                                            |
| Bal                                                         | Dhillon           |                              |                  | University of Edinburgh        |                                          |                                                         |                                                                                            |
| Andrew                                                      | Dick              |                              |                  | University of Bristol          |                                          |                                                         |                                                                                            |
| Alexander                                                   | Doney             |                              |                  | University of Dundee           |                                          |                                                         |                                                                                            |
| Cathy                                                       | Egan              |                              |                  | Moorfields Eye Hospital        |                                          |                                                         |                                                                                            |
| Sarah                                                       | Ennis             |                              |                  | University of Southampton      |                                          |                                                         |                                                                                            |
| Paul                                                        | Foster            |                              |                  | UCL Institute of Ophthalmology |                                          |                                                         |                                                                                            |
| Marcus                                                      | Fruttiger         |                              |                  | UCL Institute of Ophthalmology |                                          |                                                         |                                                                                            |
| John                                                        | Gallacher         |                              |                  | University of Oxford           |                                          |                                                         |                                                                                            |
| David                                                       | Garway-Heath      |                              |                  | UCL Institute of Ophthalmology |                                          |                                                         |                                                                                            |
| Jane                                                        | Gibson            |                              |                  | University of Southampton      |                                          |                                                         |                                                                                            |
| Jeremy                                                      | Guggenheim        |                              |                  | Cardiff University             |                                          |                                                         |                                                                                            |
| Chris                                                       | Hammond           |                              |                  | King's College London          |                                          |                                                         |                                                                                            |
| Alison                                                      | Hardcastle        |                              |                  | UCL Institute of Ophthalmology |                                          |                                                         |                                                                                            |
| Simon                                                       | Harding           |                              |                  | University of Liverpool        |                                          |                                                         |                                                                                            |

## Supplemental Online Content: Nonauthor Collaborators

\*First name, last name, and suffix (if applicable) are required and will appear in PubMed.

| *First Name and Middle Initial(s) | *Last Name   | *Suffix (eg, Jr, III) | Academic Degrees | Institution                         | Location (city, state/province, country) | Role or Contribution, eg, chair, principal investigator | Group (if more than 1 Group listed in the byline) and/or Subgroup (eg, Steering Committee) |
|-----------------------------------|--------------|-----------------------|------------------|-------------------------------------|------------------------------------------|---------------------------------------------------------|--------------------------------------------------------------------------------------------|
| Ruth                              | Hogg         |                       |                  | Queen's University Belfast          |                                          |                                                         |                                                                                            |
| Pirro                             | Hysi         |                       |                  | King's College London               |                                          |                                                         |                                                                                            |
| Pearse                            | Keane        |                       |                  | UCL Institute of Ophthalmology      |                                          |                                                         |                                                                                            |
| Peng Tee                          | Khaw         |                       |                  | UCL Institute of Ophthalmology      |                                          |                                                         |                                                                                            |
| Anthony                           | Khawaja      |                       |                  | Moorfields Eye Hospital             |                                          |                                                         |                                                                                            |
| Gerassimos                        | Lascaratos   |                       |                  | Moorfields Eye Hospital             |                                          |                                                         |                                                                                            |
| Thomas                            | Littlejohns  |                       |                  | University of Oxford                |                                          |                                                         |                                                                                            |
| Andrew                            | Lotery       |                       |                  | University of Southampton           |                                          |                                                         |                                                                                            |
| Robert                            | Luben        |                       |                  | UCL Institute of Ophthalmology      |                                          |                                                         |                                                                                            |
| Phil                              | Luthert      |                       |                  | UCL Institute of Ophthalmology      |                                          |                                                         |                                                                                            |
| Tom                               | Macgillivray |                       |                  | University of Edinburgh             |                                          |                                                         |                                                                                            |
| Sarah                             | Mackie       |                       |                  | University of Leeds                 |                                          |                                                         |                                                                                            |
| Savita                            | Madhusudhan  |                       |                  | Royal Liverpool University Hospital |                                          |                                                         |                                                                                            |
| Bernadette                        | Mcguinness   |                       |                  | Queen's University Belfast          |                                          |                                                         |                                                                                            |
| Gareth                            | Mckay        |                       |                  | Queen's University Belfast          |                                          |                                                         |                                                                                            |
| Martin                            | Mckibbin     |                       |                  | Leeds Teaching Hospitals NHS Trust  |                                          |                                                         |                                                                                            |
| Tony                              | Moore        |                       |                  | UCL Institute of Ophthalmology      |                                          |                                                         |                                                                                            |
| James                             | Morgan       |                       |                  | Cardiff University                  |                                          |                                                         |                                                                                            |
| Eoin                              | O'Sullivan   |                       |                  | King's College Hospital             |                                          |                                                         |                                                                                            |
| Richard                           | Oram         |                       |                  | University of Exeter                |                                          |                                                         |                                                                                            |
| Chris                             | Owen         |                       |                  | St George's, University of London   |                                          |                                                         |                                                                                            |
| Praveen                           | Patel        |                       |                  | Moorfields Eye Hospital             |                                          |                                                         |                                                                                            |
| Euan                              | Paterson     |                       |                  | Queen's University Belfast          |                                          |                                                         |                                                                                            |
| Tunde                             | Peto         |                       |                  | Queen's University Belfast          |                                          |                                                         |                                                                                            |
| Axel                              | Petzold      |                       |                  | UCL Institute of Neurology          |                                          |                                                         |                                                                                            |
| Nikolas                           | Pontikos     |                       |                  | UCL Institute of Ophthalmology      |                                          |                                                         |                                                                                            |
| Jugnoo                            | Rahi         |                       |                  | UCL Institute of Child Health       |                                          |                                                         |                                                                                            |
| Alicja                            | Rudnicka     |                       |                  | St George's, University of London   |                                          |                                                         |                                                                                            |
| Naveed                            | Sattar       |                       |                  | University of Glasgow               |                                          |                                                         |                                                                                            |
| Jay                               | Self         |                       |                  | University of Southampton           |                                          |                                                         |                                                                                            |
| Panagiotis                        | Sergouniotis |                       |                  | The University of Manchester        |                                          |                                                         |                                                                                            |

## Supplemental Online Content: Nonauthor Collaborators

\*First name, last name, and suffix (if applicable) are required and will appear in PubMed.

| *First Name and Middle Initial(s) | *Last Name  | *Suffix (eg, Jr, III) | Academic Degrees | Institution                                    | Location (city, state/province, country) | Role or Contribution, eg, chair, principal investigator | Group (if more than 1 Group listed in the byline) and/or Subgroup (eg, Steering Committee) |
|-----------------------------------|-------------|-----------------------|------------------|------------------------------------------------|------------------------------------------|---------------------------------------------------------|--------------------------------------------------------------------------------------------|
| Sobha                             | Sivaprasad  |                       |                  | Moorfields Eye Hospital                        |                                          |                                                         |                                                                                            |
| David                             | Steel       |                       |                  | Newcastle University                           |                                          |                                                         |                                                                                            |
| Irene                             | Stratton    |                       |                  | Gloucestershire Hospitals NHS Foundation Trust |                                          |                                                         |                                                                                            |
| Nicholas                          | Strouthidis |                       |                  | Moorfields Eye Hospital                        |                                          |                                                         |                                                                                            |
| Cathie                            | Sudlow      |                       |                  | University of Edinburgh                        |                                          |                                                         |                                                                                            |
| Zihan                             | Sun         |                       |                  | UCL Institute of Ophthalmology                 |                                          |                                                         |                                                                                            |
| Robyn                             | Tapp        |                       |                  | St George's, University of London              |                                          |                                                         |                                                                                            |
| Dhanes                            | Thomas      |                       |                  | Moorfields Eye Hospital                        |                                          |                                                         |                                                                                            |
| Emanuele                          | Trucco      |                       |                  | University of Dundee                           |                                          |                                                         |                                                                                            |
| Adnan                             | Tufail      |                       |                  | Moorfields Eye Hospital                        |                                          |                                                         |                                                                                            |
| Ananth                            | Viswanathan |                       |                  | Moorfields Eye Hospital                        |                                          |                                                         |                                                                                            |
| Veronique                         | Vitart      |                       |                  | University of Edinburgh                        |                                          |                                                         |                                                                                            |
| Mike                              | Weedon      |                       |                  | University of Exeter                           |                                          |                                                         |                                                                                            |
| Katie                             | Williams    |                       |                  | King's College London                          |                                          |                                                         |                                                                                            |
| Cathy                             | Williams    |                       |                  | University of Bristol                          |                                          |                                                         |                                                                                            |
| Jayne                             | Woodside    |                       |                  | Queen's University Belfast                     |                                          |                                                         |                                                                                            |
| Max                               | Yates       |                       |                  | University of East Anglia                      |                                          |                                                         |                                                                                            |
| Yalin                             | Zheng       |                       |                  | University of Liverpool                        |                                          |                                                         |                                                                                            |
