# Supplementary material
Source: PubMed Central journal article supplement (PMC10436188)
Supplement: jamaophthalmol-e233645-s003.pdf [file jamaophthalmol-e233645-s003.pdf]

## **Data Sharing Statement**

Sekimitsu. Deep Ocular Phenotyping Across Primary Open-Angle Glaucoma Genetic Burden. *JAMA Ophthalmol.* Published August 17, 2023. doi:10.1001/jamaophthalmol.2023.3645

### **Data**

**Data available:** No
